# Supplementary material
Source: Springer Nature journal article supplement (https://www.springermedizin.de/resource/supplementary/12906_2008_236_MOESM4_ESM.pdf/9524338)
Supplement: MOESM4 [file 9524338]

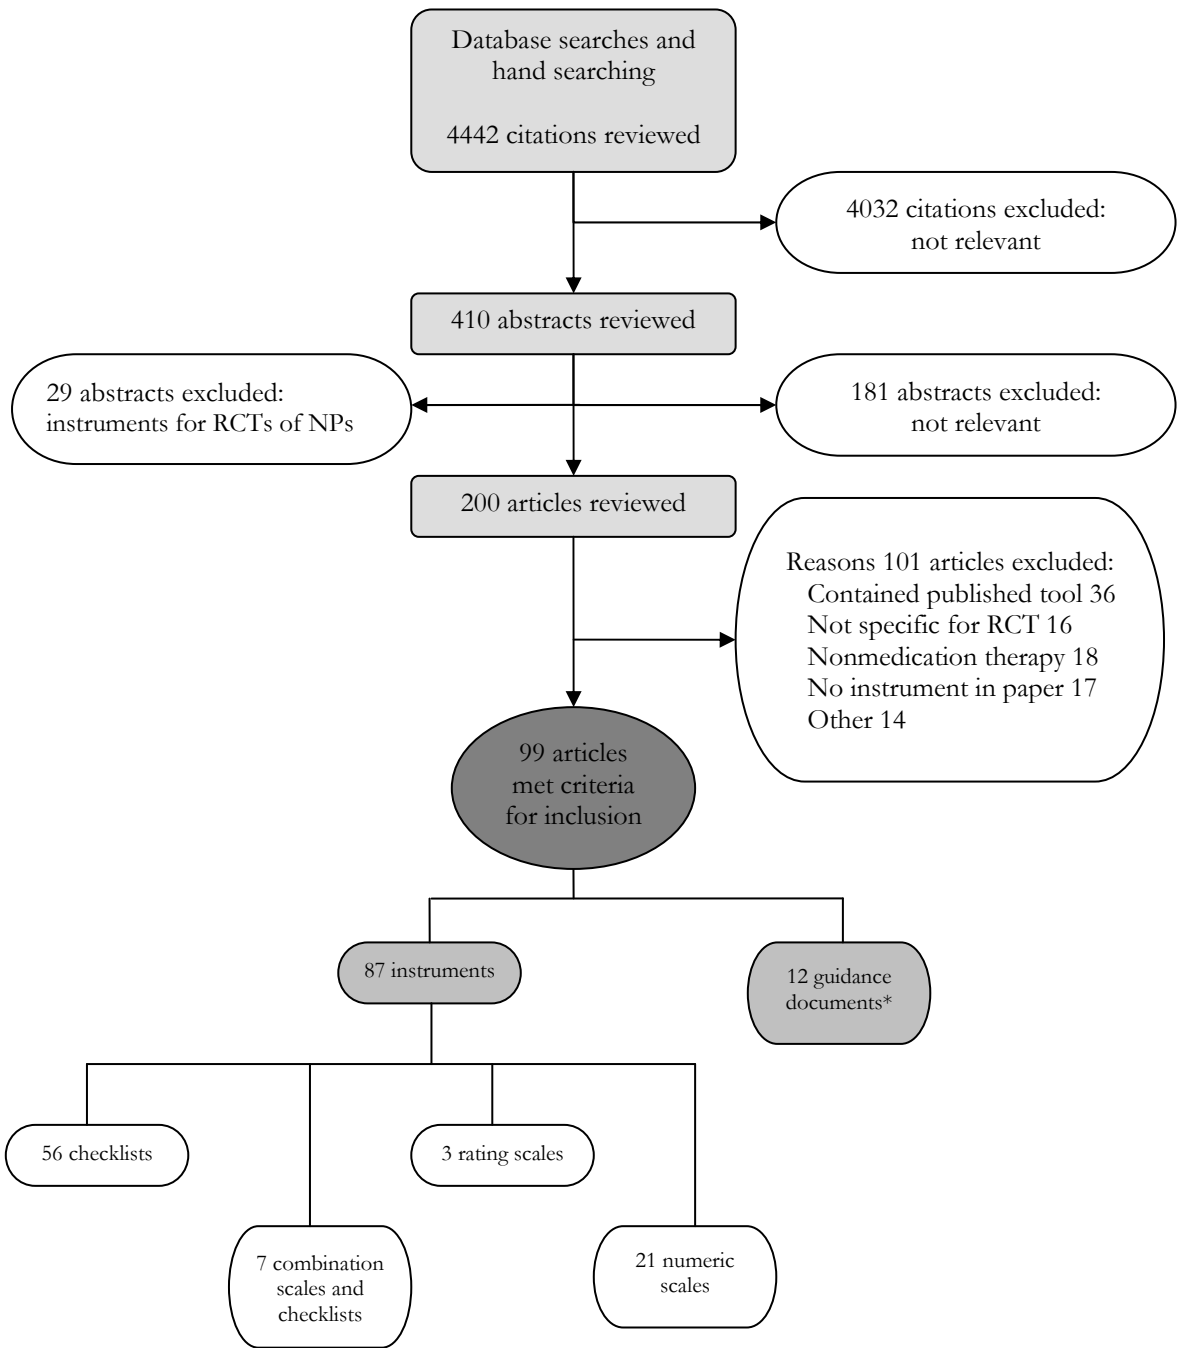

\* Guidance Documents: Articles detailing how to report an RCT and/or discussing importance of quality assessment and providing suggested items of importance.
